# Supplementary material for: Preliminary analysis of Psoroptes ovis transcriptome in different developmental stages
Source: Parasit Vectors. 2016 Nov 4;9:570. doi: 10.1186/s13071-016-1856-z (PMC5096302; doi:10.1186/s13071-016-1856-z)
Supplement: Additional file 2: Table S2. — The quality of transcriptome data. (XLSX 10 kb) [file 13071_2016_1856_MOESM2_ESM.xlsx]

## Sheet: 表S1
		Additional file 2. Table S2. The quality of transcriptome data from P. ovis
Sample	Raw Reads	Clean Reads	Clean Bases	Error(%)	Q20(%)	Q30(%)	GC Content(%)
Pso_L_1	29724248	28315011	2.83G	0.04	96.3	89.43	35.83
Pso_L_2	29724248	28315011	2.83G	0.03	97.51	92.5	35.87
Pso_N_A_1	27713011	26474832	2.65G	0.04	96.39	89.47	34.88
Pso_N_A_2	27713011	26474832	2.65G	0.03	96.68	90.38	34.91
